# Supplementary material for: Identification and Evaluation of Cytotoxicity of Peptide Liposome Incorporated Citron Extracts in an in Vitro System
Source: Int J Mol Sci. 2018 Feb 22;19(2):626. doi: 10.3390/ijms19020626 (PMC5855848; doi:10.3390/ijms19020626)
Supplement: Supplementary file 1 [file ijms-19-00626-s001.pdf]

## Supplementary Materials: Identification and Evaluation of Cytotoxicity of Peptide Liposome Incorporated Citron Extracts in an *in Vitro* System

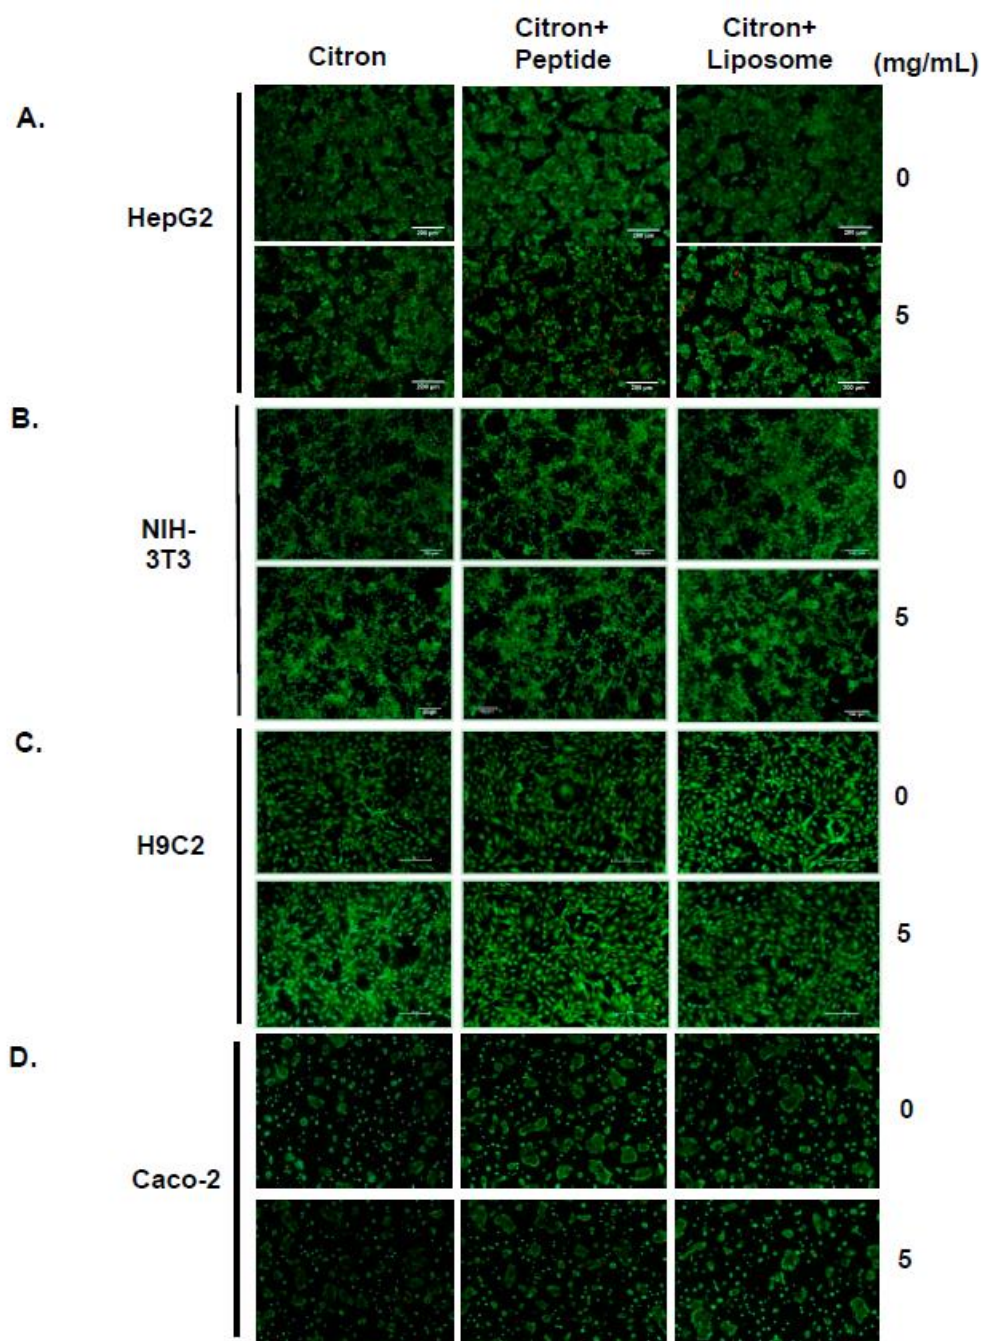

**Figure S1. Visualization of Cell cytotoxicity by Live/Dead assay.** (A) The HepG2 cells were seeded into 48-well plate. Followed by 24 h incubation after the treatment of tested samples, the cells were stained by using fluorescent dyes according to Live/Dead assay kit. The merged images showed in figure were to show co-distribution of live and dead cells; (B) NIH-3T3 cells; (C) H9C2 cells; (D) Caco-2 cells.

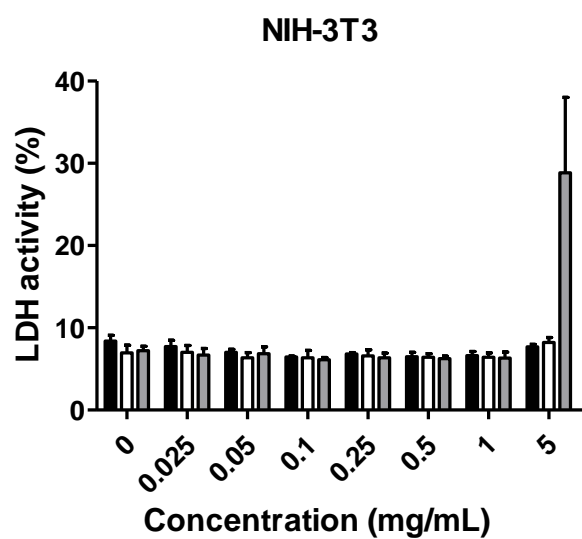

(A)

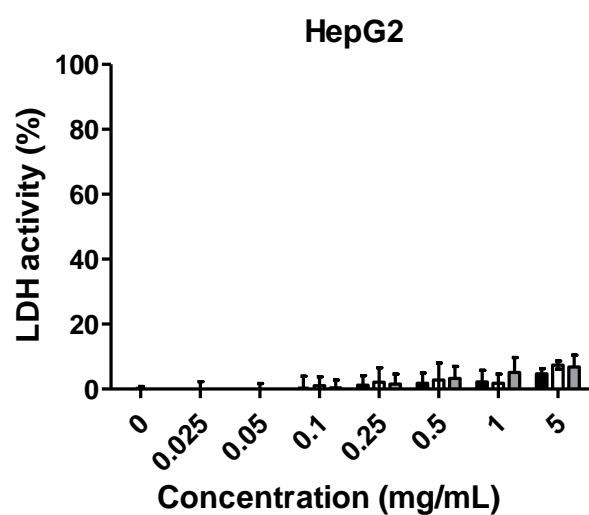

(B)

**Figure S2.** Cytotoxicity measurement by EZ-LDH assay. (A) NIH-3T3 cells were cultured in 96-well plate. Then, the cells were incubated with different concentration of citron extracts. After incubation for 24 h, cell cytotoxicity was measured by using EZ-LDH assay kits according to the manufacturer's introduction; (B) HepG2 cells. The program GraphPad Prism 5.0 was performed to analysis data and make graphs. The experiments were repeated three times with similar outcomes. Color in graph: Black-Citron; White-Citron<sub>peptide</sub>; Gray-Citron<sub>liposome</sub>.

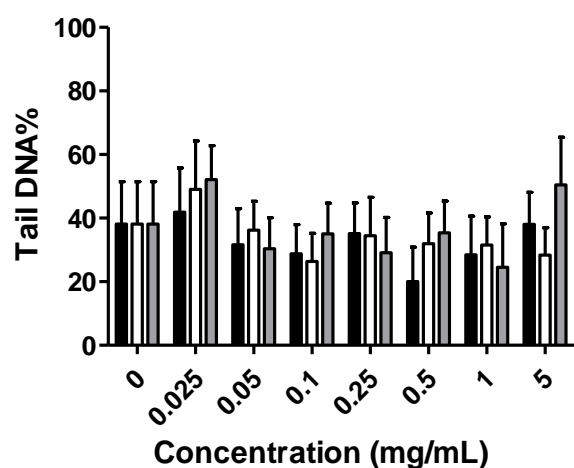

**Figure S3.** Genotoxicity determination by comet assay. The hCPCs were seeded into 48-well plate to perform this experiment. Following 24 h incubation after treatment of tested samples, the assay was carried out according to the comet assay protocol as described in “Materials and Methods”. Color in graph: Black-Citron; White-Citron<sub>peptide</sub>; Gray-Citron<sub>liposome</sub>. Scale bar is 100  $\mu$ m.

**Table S1.** Content ratio of citron samples (Citron, Citron<sub>peptide</sub>, and Citron<sub>liposome</sub>).

| Sample                     | Citron extract (g) | Peptide (g) | Lecithin (g) | DW (mL) |
|----------------------------|--------------------|-------------|--------------|---------|
| Citron                     | 25                 | -           | -            | 50      |
| Citron <sub>peptide</sub>  | 25                 | 3           | -            | 75      |
| Citron <sub>liposome</sub> | 25                 | 3           | 0.5          | 75      |

DW: distilled water

**Table S2.** General composition of citron extract.

| Ingredient    | Content (g) |
|---------------|-------------|
| Moisture      | 86          |
| Protein       | 0.93        |
| Lipid         | 0.09        |
| Ash           | 0.44        |
| Carbohydrate  | 12.54       |
| Sugars        | 4.1         |
| Sietary fiber | 8.2         |

The data were calculated by using 100 g citron.

\* Data obtained from Rural Development Administration, Korea.

**Table S3.** Components of total amino acids of citron extract.

| <b>components</b>         | <b>Content (mg)</b> |
|---------------------------|---------------------|
| Total amino acids         | 909                 |
| Essential amino acids     | 239                 |
| Non-essential amino acids | 670                 |

The data were calculated by using 100 g citron.

\* Data obtained from Rural Development Administration, Korea

**Table S4.** Components of fatty acid of citron extract.

| <b>Fatty acid</b>          | <b>Content (g)</b> |
|----------------------------|--------------------|
| Total fatty acid           | 0.08               |
| Essential fatty acid       | 0.05               |
| Saturates fatty acid       | 0.02               |
| Monounsaturated fatty acid | 0.01               |
| Polyunsaturated fatty acid | 0.05               |

The data were calculated by using 100 g citron.

\* Data obtained from Rural Development Administration, Korea

**Table S5.** Components of minerals of citron extract.

| <b>Minerals</b> | <b>Content (mg)</b>  |
|-----------------|----------------------|
| Ca              | 36                   |
| Fe              | 0.16                 |
| Mg              | 12                   |
| P               | 15                   |
| K               | 17                   |
| Na              | 3                    |
| Zn              | 0.39                 |
| <u>Mn</u>       | 0.13                 |
| Mo              | 2.2x10 <sup>-4</sup> |

The data were calculated by using 100 g citron.

\* Data obtained from Rural Development Administration, Korea.

**Table S6.** Components of vitamins of citron extract.

| Vitamins         | Content (mg)          |
|------------------|-----------------------|
| Beta-carotene    | $8 \times 10^{-3}$    |
| Vitamin E        | 1.22                  |
| Vitamin B1       | 0.15                  |
| Vitamin B2       | 0.05                  |
| Niacin           | 0.1                   |
| Vitamin B5       | 1.62                  |
| Biotin           | $2.79 \times 10^{-3}$ |
| Folic acid (DFE) | $1.5 \times 10^{-2}$  |
| Vitamin C        | 95.03                 |

The data were calculated by using 100 g citron.

\* Data obtained from Rural Development Administration, Korea.
